# Supplementary material for: LED-based solar simulator to study photochemistry over a wide temperature range in the large simulation chamber AIDA
Source: Copernicus journal article supplement (doi:10.5194/amt-15-1795-2022), 2022-03-25
Supplement: Supplementary file 1 [file amt-15-1795-2022-supplement.pdf]

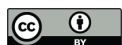

*Supplement of*

## **LED-based solar simulator to study photochemistry over a wide temperature range in the large simulation chamber AIDA**

**Magdalena Vallon et al.**

*Correspondence to:* Harald Saathoff ([harald.saathoff@kit.edu](mailto:harald.saathoff@kit.edu))

The copyright of individual parts of the supplement might differ from the article licence.

Table S1: Experimental conditions:

| Photolysis of 2,3-pentanedione               |                                                        |                                                                        |                                                        |                                                                                                                      |                                    |
|----------------------------------------------|--------------------------------------------------------|------------------------------------------------------------------------|--------------------------------------------------------|----------------------------------------------------------------------------------------------------------------------|------------------------------------|
| starting concentration [ppb]                 | illumination [min]                                     | relative humidity [%]                                                  | temperature [K]                                        |                                                                                                                      |                                    |
| 66                                           | 65                                                     | 12                                                                     | 213                                                    |                                                                                                                      |                                    |
| 66                                           | 65                                                     | < 1                                                                    | 243                                                    |                                                                                                                      |                                    |
| 20                                           | 65                                                     | 1                                                                      | 273                                                    |                                                                                                                      |                                    |
| 67                                           | 60                                                     | < 1                                                                    | 283                                                    |                                                                                                                      |                                    |
| 71                                           | 60                                                     | < 1                                                                    | 298                                                    |                                                                                                                      |                                    |
| 71                                           | 15 (intervals)                                         | < 1                                                                    | 298                                                    |                                                                                                                      |                                    |
| Photolysis of DTDP                           |                                                        |                                                                        |                                                        |                                                                                                                      |                                    |
| DTDP                                         | NH <sub>4</sub> NO <sub>3</sub> [mol l <sup>-1</sup> ] | (NH <sub>4</sub> ) <sub>2</sub> SO <sub>4</sub> [mol l <sup>-1</sup> ] | illumination [min]                                     | relative humidity [%]                                                                                                | temperature [K]                    |
| 1 ml of prepared DTDP solution               | 0.026                                                  | -                                                                      | 120                                                    | 75                                                                                                                   | 283                                |
| 1 ml of prepared DTDP solution               | 0.026                                                  | -                                                                      | 120                                                    | 77                                                                                                                   | 273                                |
| 0.005 mol l <sup>-1</sup>                    | 0.025                                                  | 0.009                                                                  | 120                                                    | 79                                                                                                                   | 293                                |
| 1 ml of prepared DTDP solution               | 0.026                                                  | -                                                                      | 120                                                    | 70                                                                                                                   | 264                                |
| Photosensitization experiments:              |                                                        |                                                                        |                                                        |                                                                                                                      |                                    |
| Aerosol conc. [μg m <sup>-3</sup> ]          | 1 <sup>st</sup> illumination [min]                     | 2 <sup>nd</sup> illumination [min]                                     | relative humidity [%]                                  | temperature [K]                                                                                                      |                                    |
| 10 (solution 1)                              | 67                                                     | 64                                                                     | 87                                                     | 283                                                                                                                  |                                    |
| 11 (solution 2)                              | 60                                                     | 61                                                                     | 72                                                     | 243                                                                                                                  |                                    |
| 12 (solution 2)                              | 60                                                     | 60                                                                     | 55                                                     | 213                                                                                                                  |                                    |
| 16 (reference solution)                      | 61                                                     | -                                                                      | 88                                                     | 283                                                                                                                  |                                    |
| Solutions for photosensitization experiments |                                                        |                                                                        |                                                        |                                                                                                                      |                                    |
|                                              | pinonic acid [mol l <sup>-1</sup> ]                    | pinic acid [mol l <sup>-1</sup> ]                                      | NH <sub>4</sub> NO <sub>3</sub> [mol l <sup>-1</sup> ] | Fe <sub>2</sub> (C <sub>2</sub> O <sub>4</sub> ) <sub>3</sub> (H <sub>2</sub> O) <sub>6</sub> [mol l <sup>-1</sup> ] | oxalic acid [mol l <sup>-1</sup> ] |
| solution 1                                   | 0.0065                                                 | 0.0073                                                                 | 0.013                                                  | 0.0021                                                                                                               | -                                  |

|                    |        |        |       |        |        |
|--------------------|--------|--------|-------|--------|--------|
| solution 2         | 0.0064 | 0.0019 | 0.013 | 0.0021 | -      |
| reference solution | 0.012  | -      | 0.026 | -      | 0.0081 |

Table S2: List of LEDs:

| peak wavelength | LED model              | producer     | optical power [W] | number |
|-----------------|------------------------|--------------|-------------------|--------|
| 305 nm          | LEUVA77N50KU00 4in1    | LG Innotek   | 0.3               | 6      |
|                 | EOLS-310-637           | EPIGAP       | 0.06              | 108    |
| 325 nm          | EOLS-325-697           | EPIGAP       | 0.56              | 802    |
| 340 nm          | EOLS-340-697           | EPIGAP       | 0.06              | 802    |
| 365 nm          | LEUVA77Z80TV00 4in1    | LG Innotek   | 5.0               | 32     |
|                 | CUN66B1G               | Seoul Viosys | 1.8               | 50     |
| 385 nm          | LEUVA77Z80TV00 4in1    | LG Innotek   | 6.0               | 40     |
|                 | CUN86B1G               | Seoul Viosys | 2.0               | 60     |
| 405 nm          | LEUVA77Z80VV00 4in1    | LG Innotek   | 6.0               | 40     |
|                 | CUN06B1G               | Seoul Viosys | 2.0               | 80     |
| 415 nm          | LEUVA33W70WL00         | LG Innotek   | 1.9               | 27     |
| 420 nm          | CUN26B1B               | Seoul Viosys | 1.04              | 54     |
| 455 nm          | OSLON SSL GD CS8PM1.14 | Osram        | 1.5               | 160    |
| 465 nm          | OSLON SSL GB CS8PM1.13 | Osram        | 1.06              | 224    |
| 528 nm          | OSLON SSL GT CS8PM1.13 | Osram        | 0.37              | 528    |

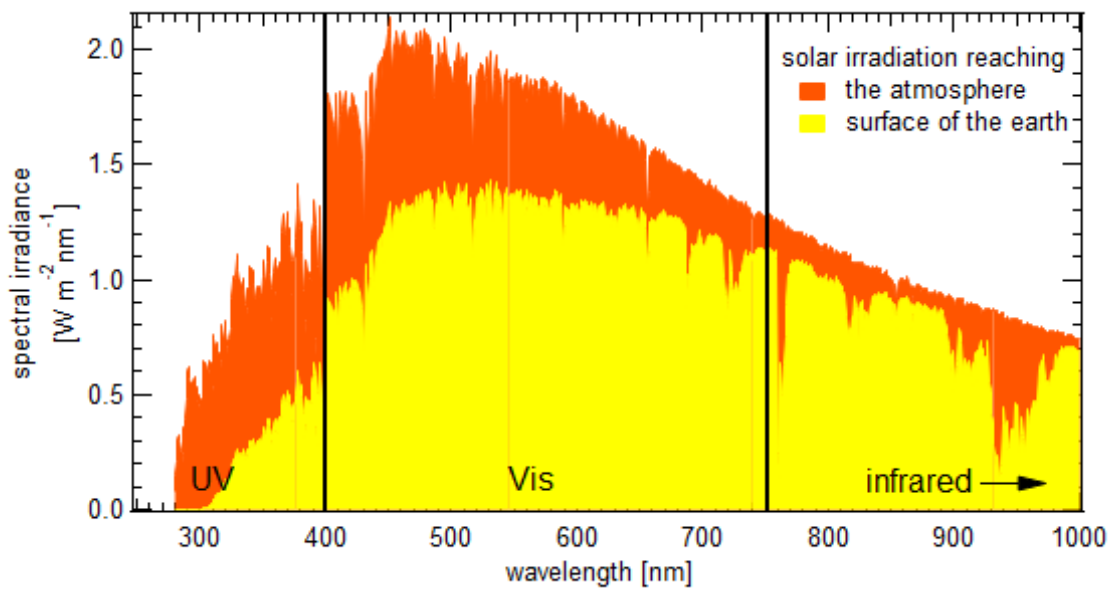

Figure S1: Solar Spectrum in the atmopshere derived from SMARTS v. 2.9.2 (ASTM G173-03 Reference Spectrum):

Reference: Data from United States Department of Energy, National Renewable Energy Laboratory, Reference Solar Spectral

10 Irradiance: ASTM G-173, <https://www.nrel.gov/grid/solar-resource/assets/data/astmg173.xls>

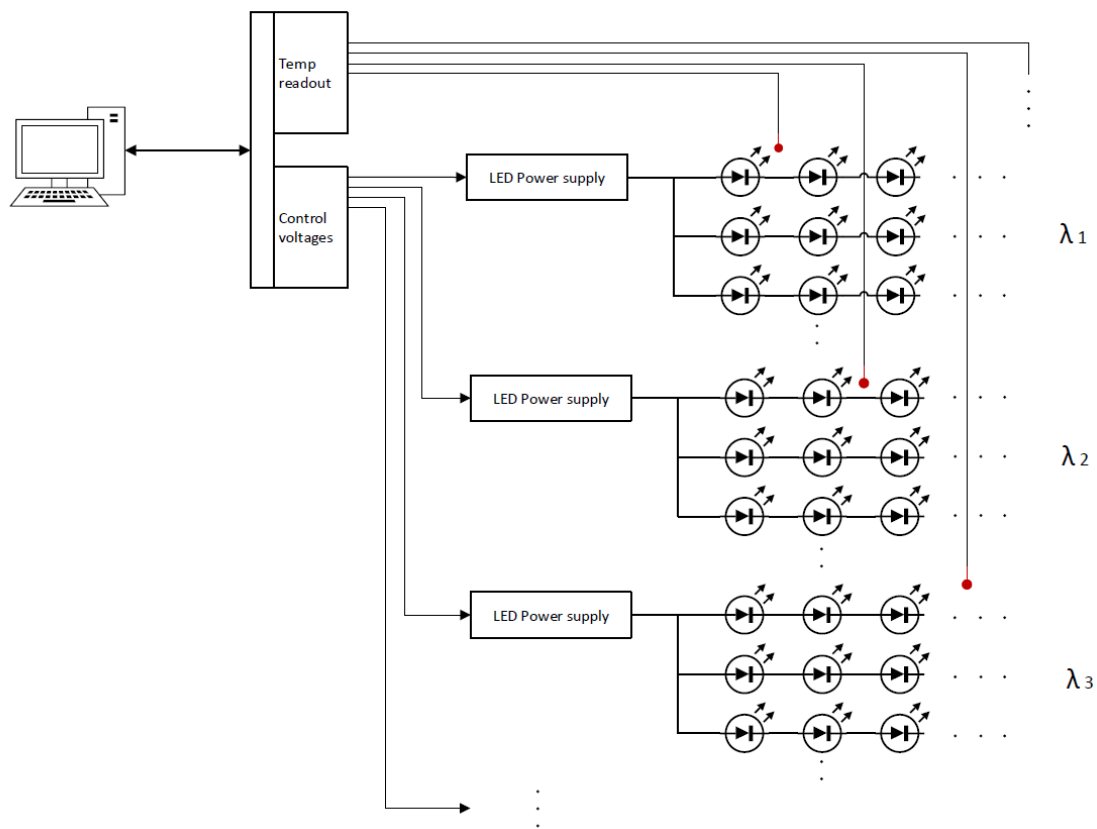

Figure S2: Electronic connection scheme for the LED power control and temperature readout.

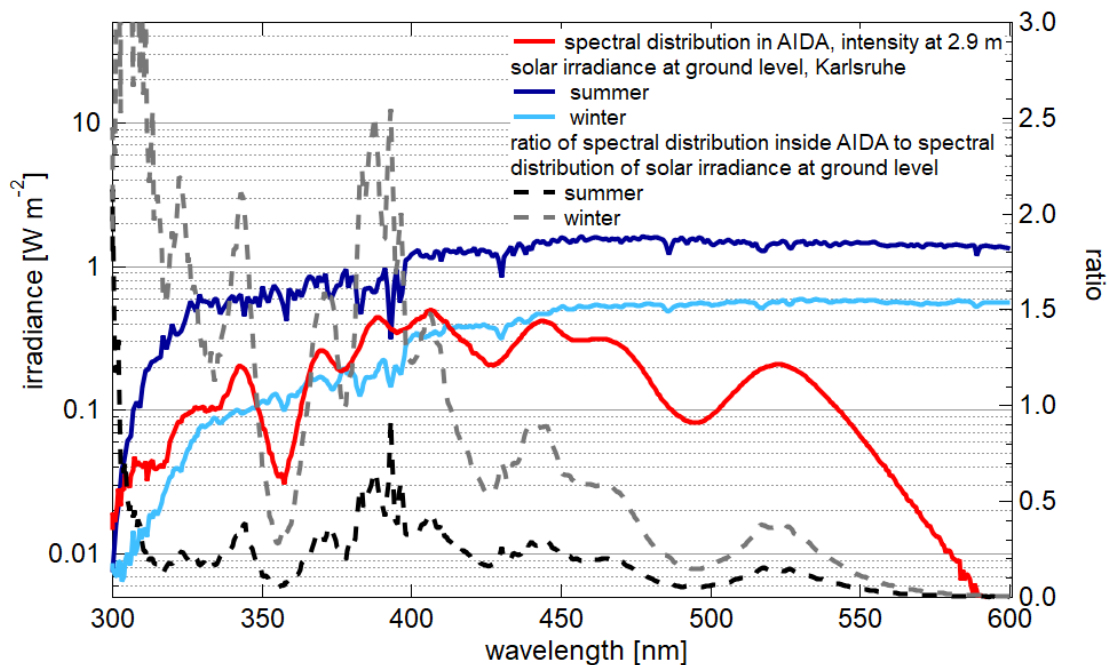

15 Figure S3: Left axis: Spectra in summer and winter in Karlsruhe at ground level as well as in AIDA at 2.9 m. Right axis: Ratio of spectral distribution divided through the respective solar spectra.

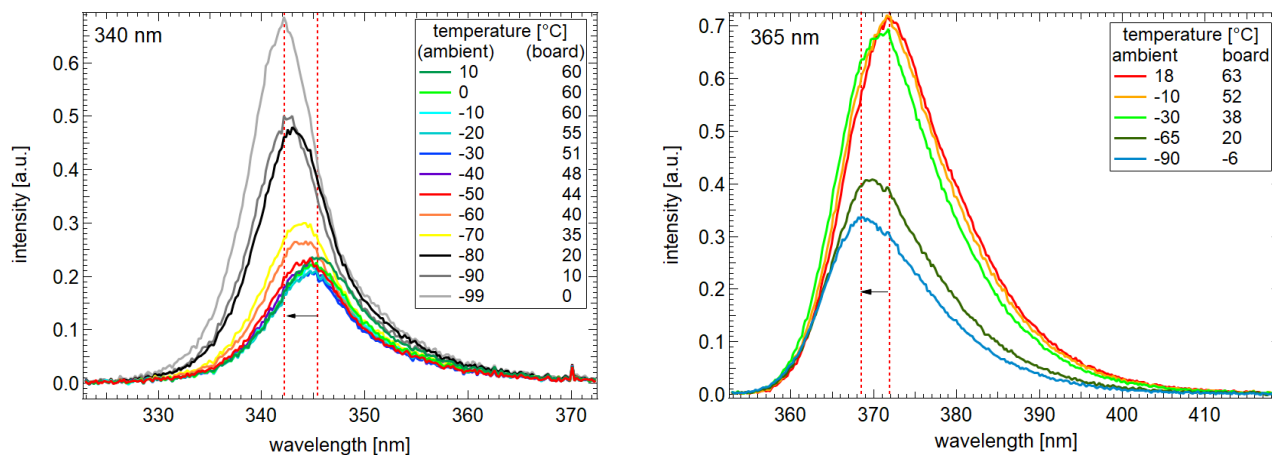

20 Figure S4: Emission spectra of two LEDs at different ambient temperatures. The temperature of the LED-board can be different in the actual setting of the light source as the LED tests were made on a different heat sink.

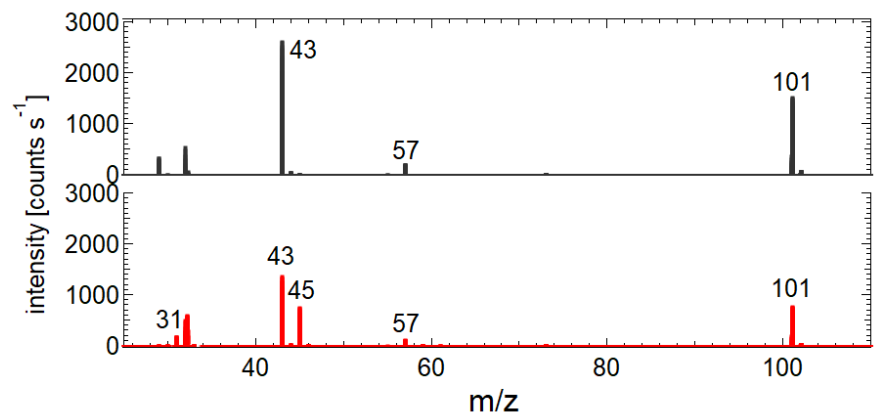

Figure S5: Mass Spectrum of 2,3-pentanedione before and after illumination (PTRMS): The mass peak for 2,3-pentanedione can be found at  $m/z$  101.  $M/z$  43 and  $m/z$  57 refer to fragments of 2,3-pentanedione.  $M/z$  45 and  $m/z$  31 refer to the reaction products acetaldehyde and formaldehyde.

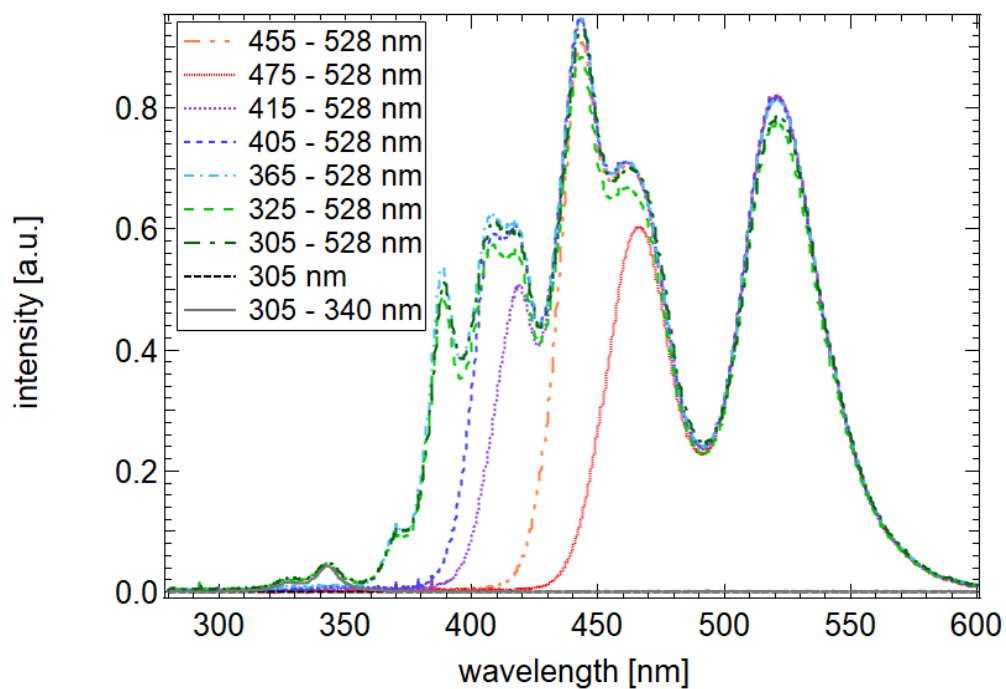

Figure S6: Spectra taken at the bottom of the chamber with different settings for the LEDs, resulting in different emission spectra of the light source.

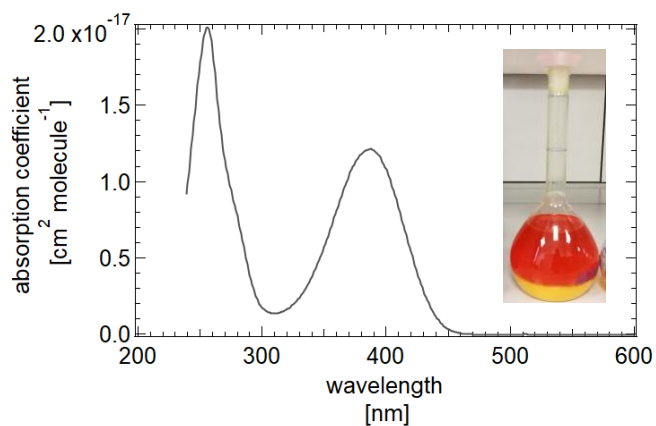

Figure S7: Absorption spectrum of 3,5-diacetyl-2,4,6-trimethyl-1,4-dihydropyridin ( $19.25 \mu\text{mol l}^{-1}$  in water). Insert shows the red colour of the compound in a mixture of water and methanol after synthesis from acetaldehyde and 2,3-pentadione in presence of  $(\text{NH}_4)_2\text{SO}_4$ .

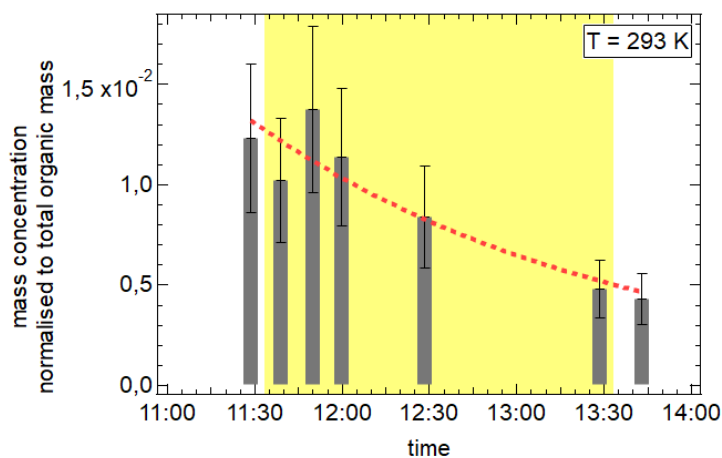

Figure S8: Mass concentration of 3,5-diacetyl-2,4,6-trimethyl-1,4-dihydropyridine in the particle phase at 293 K, normalised to the total organic mass of every filter measurement. The concentration decreases over the illumination period.



40

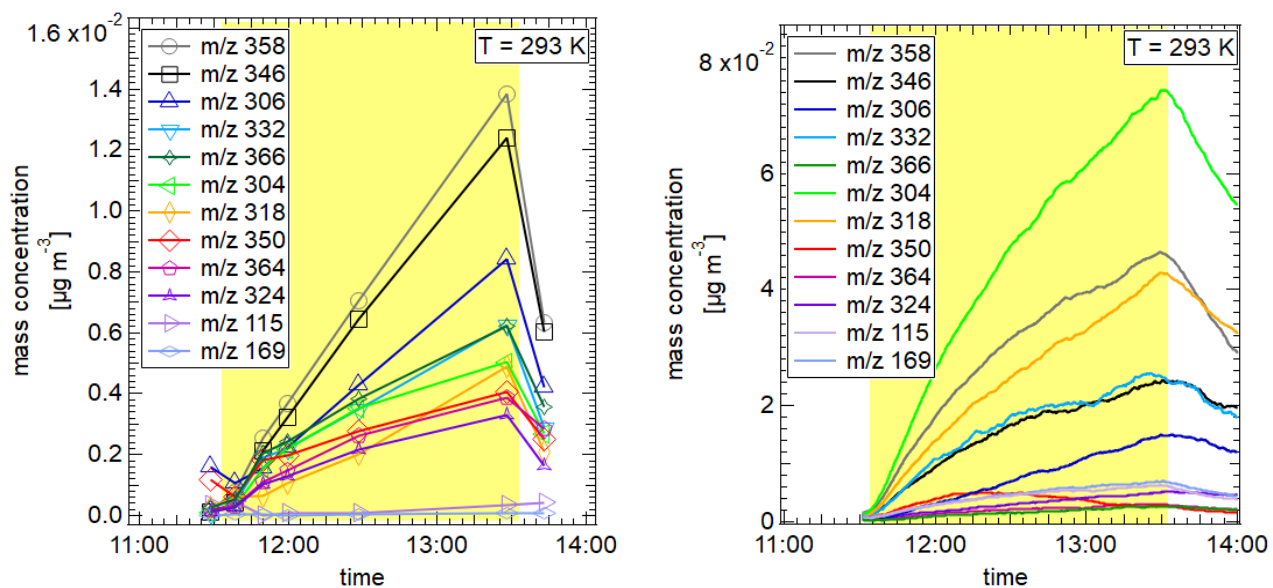

Figure S9: Mass increase of 16 components in particle (left) and gas phase (right) during illumination of an aerosol containing 3,5-diacetyl-2,4,6-trimethyl-1,4-dihydropyridine,  $(\text{NH}_4)_2\text{SO}_4$  and  $\text{NH}_4\text{NO}_3$ . The masses include the iodide used in the ionization process.

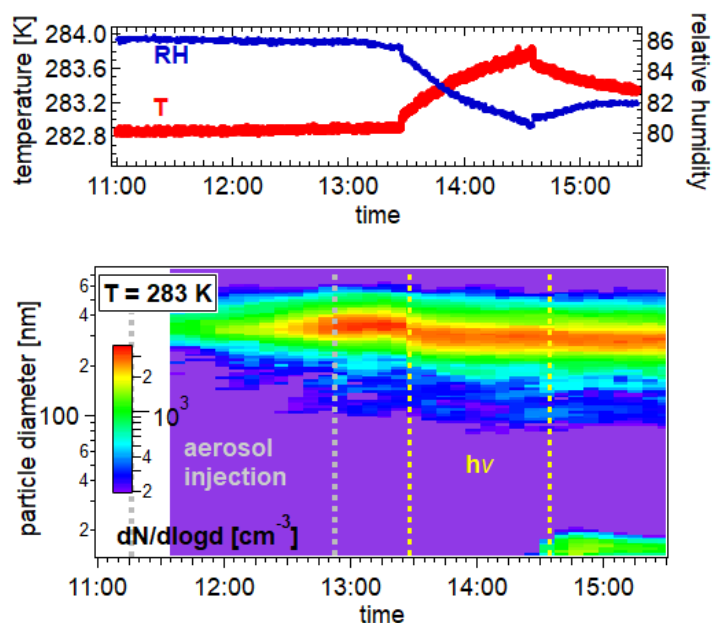

45

Figure S10: temperature, relative humidity and particle size distribution over the course of one experiment. Aerosol injection and illumination period is marked separately. During illumination the temperature increases by 0.8 K. The sudden rise and

decrease of the temperature at the beginning and end of the illumination is due to the direct illumination of the temperature sensors. With increase of temperature, the relative humidity reduces by 5 percentage points. at the same time the particle diameter reduces by 50 nm.

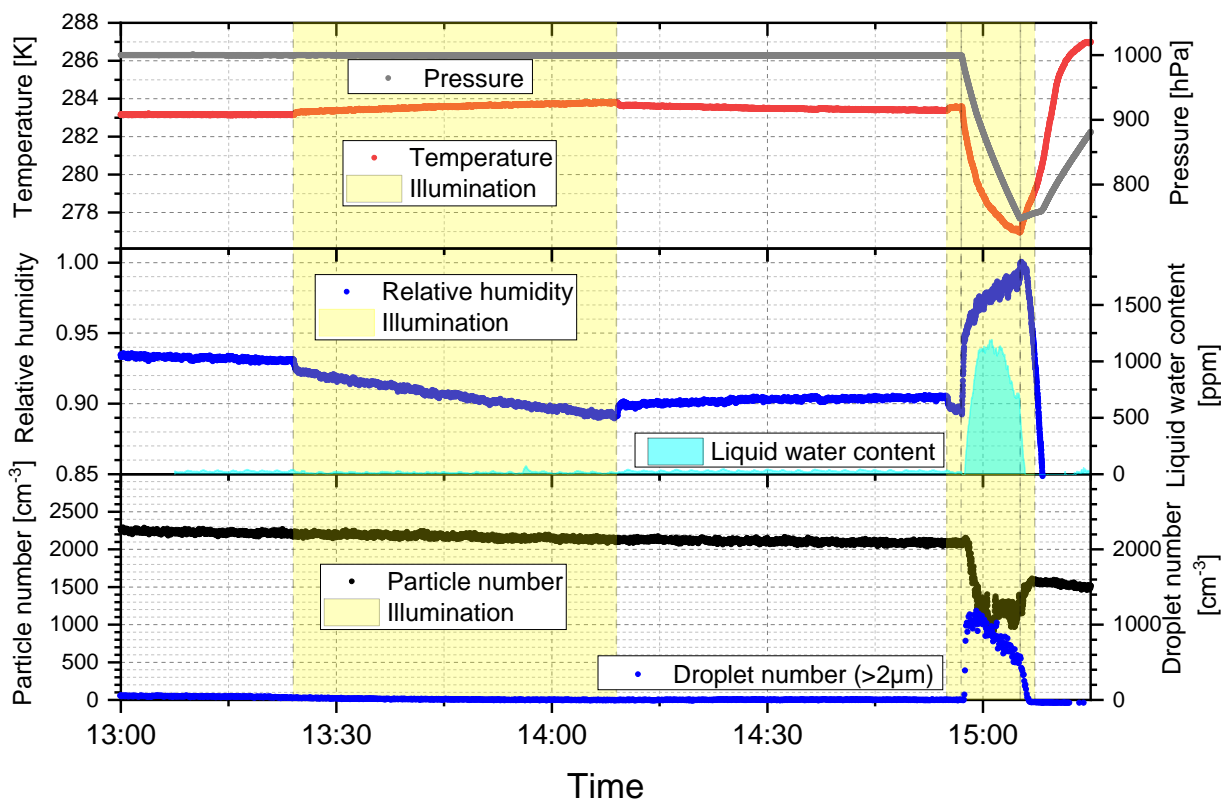

Figure S11: Aerosol particles of 60 wt.% NaCl + 20 wt.% humic acid + 20 wt.% nonanoic acid at 283 K and an initial relative humidity of 93 %. During the first illumination, the temperature increases and the relative humidity decreases correspondingly. During the second illumination an adiabatic expansion lead to an increase of the relative humidity resulting in an activation of about half of the aerosol particles as cloud droplets with a mean diameter of about  $7 \pm 1 \mu\text{m}$ . Please note that the stepwise change in temperature and relative humidity for switching on and off the light source is due to direct impact of radiation on the temperature sensors and not to a real sudden change in temperature.

Text S1:  $\text{NO}_2$ -photolysis frequencies for the illumination conditions in Karlsruhe were calculated with the Quick TUV calculator of the National Center for Atmospheric Research ([https://www.acom.ucar.edu/Models/TUV/Interactive\\_TUV/](https://www.acom.ucar.edu/Models/TUV/Interactive_TUV/)) for two days with the following settings:

Radiation scheme: 2 streams Wavelength: 280 - 700nm  
Altitude: 118m  
Date and time: 31.05.2018 12:00:00 respectively 20.12.2018 12:00:00  
Latitude: 4.00937  
Longitude: 8.404440  
Solar zenith angle: 27.98776  
Overhead ozone column: 300 du  
Surface albedo: 0.1  
Clouds: Opt. depth:0; Base:4; Top:5  
Aerosols: Opt. depth: 0.235; S-S Alb: 0.99; Alpha: 1  
Sunlight: Direct beam: 1; Diffuse down:1; Diffuse up:1

The calculated photolysis frequencies were used as a comparison for the NO<sub>2</sub>-photolysis frequencies determined for the illumination conditions inside the AIDA-chamber.
